## RESEARCH ARTICLE

## Microalgae-based biofertilizer improves fruit yield and controls greenhouse gas emissions in a hawthorn orchard

Fen Ma<sup>1</sup>, Yingchun Li<sup>1\*</sup>, Xue Han<sup>1</sup>, Kuo Li<sup>1</sup>, Mingyue Zhao<sup>1</sup>, Liping Guo<sup>1</sup>, Shifeng Li<sup>2,3,4</sup>, Kangjie Wang<sup>2,3,5</sup>, Kangxi Qin<sup>2,3</sup>, Jian Duan<sup>2,3</sup>, Yutong Liu<sup>2,3</sup>, Yuxuan Xu<sup>2,3</sup>

**1** Institute of Environment and Sustainable Development in Agriculture, Chinese Academy of Agricultural Sciences, Beijing, China, **2** Shanxi School-Local Cooperative Microalgae Research Institute Co. Ltd., Yuncheng School-Local Cooperative Microalgae Research Institute, Yuncheng, China, **3** Microalgae Resources Agricultural Utilization Laboratory, Yuncheng Difulai Biotechnology Development Co. Ltd., Yuncheng, China, **4** Vegetation Restoration Engineering Technology Research Center, China Agricultural University, Beijing, China, **5** Yuncheng Famous and Excellent Agricultural Products Brand Construction Workstation, Yuncheng Agriculture and Rural Bureau of Shanxi Province, Yuncheng, China

\* [liyingchun@caas.cn](mailto:liyingchun@caas.cn)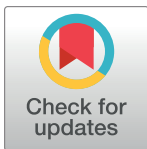

## OPEN ACCESS

**Citation:** Ma F, Li Y, Han X, Li K, Zhao M, Guo L, et al. (2024) Microalgae-based biofertilizer improves fruit yield and controls greenhouse gas emissions in a hawthorn orchard. PLoS ONE 19(8): e0307774. <https://doi.org/10.1371/journal.pone.0307774>

**Editor:** Peddisetty Pardha-Saradhi, University of Delhi, INDIA

**Received:** February 29, 2024

**Accepted:** July 11, 2024

**Published:** August 2, 2024

**Copyright:** © 2024 Ma et al. This is an open access article distributed under the terms of the [Creative Commons Attribution License](https://creativecommons.org/licenses/by/4.0/), which permits unrestricted use, distribution, and reproduction in any medium, provided the original author and source are credited.

**Data Availability Statement:** All relevant data are within the paper.

**Funding:** The authors received the following funding for this work, including Agricultural Science and Technology Innovation Program (CAASZDRW202417, CAAS-CSGLCA-202301) awarded to YL and XH, National Natural Science Foundation of China (D41105115) awarded to YL, and Central Public-interest Scientific Institution Basal Research Fund (Y2020PT05) awarded to YL. The funders had no role in study design, data

## Abstract

Raising attentions have focused on how to alleviate greenhouse gas (GHG) emissions from orchard system while simultaneously increase fruit production. Microalgae-based biofertilizer represents a promising resource for improving soil fertility and higher productivity. However, the effects of microalgae application more especially live microalgae on GHG emissions are understudied. In this study, fruit yield and quality, GHG emissions, as well as soil organic carbon and nitrogen fractions were examined in a hawthorn orchard, under the effects of live microalgae-based biofertilizer applied at three doses and two modes. Compared with conventional fertilization, microalgae improved hawthorn yield by 15.7%–29.6% with a maximal increment at medium dose by root application, and significantly increased soluble and reducing sugars contents at high dose. While microalgae did not increase GHG emissions except for nitrous oxide at high dose by root application, instead it significantly increased methane uptake by 1.5–2.3 times in root application. In addition, microalgae showed an increasing trend in soil organic carbon content, and significantly increased the contents of soil dissolved organic carbon and microbial biomass carbon, as well as soil ammonium nitrogen and dissolved organic nitrogen at medium dose with root application. Overall, the results indicated that the live microalgae could be used as a green biofertilizer for improving fruit yield without increasing GHG emissions intensity and the comprehensive greenhouse effect, in particular at medium dose with root application. We presume that if lowering chemical fertilizer rates, application of the live microalgae-based biofertilizer may help to reduce nitrous oxide emissions without compromising fruit yield and quality.

collection and analysis, decision to publish, or preparation of the manuscript.

**Competing interests:** The authors have declared that no competing interests exist.

## Introduction

Global warming caused by greenhouse gas (GHG) emissions mainly in carbon dioxide (CO<sub>2</sub>), methane (CH<sub>4</sub>) and nitrous oxide (N<sub>2</sub>O), is an important ecological issue, and agricultural cultivation is one of the main sources of GHG emissions [1]. Fertilization is a common agricultural practice to ensure plant yield and quality, meanwhile results in raising GHG emissions [2]. Due to relatively high economic benefits of fruit industry, global fruit planting area has expanded during a recent decade with a global area of 64.9 Mha in 2020 [3]. China is one of the highest fruit producers in the world, with an increase of 42% in orchard acreage from 2000 to 2020 [4]. The expansion of fruit orchards, characterized by high inputs of fertilizer and pesticide, has raised serious concerns over the risk of GHG especially N<sub>2</sub>O emissions [5]. Moreover, Gu et al. [6] reported that N<sub>2</sub>O emissions of orchards were much higher than those of cropland in the same region. For instance, due to high nitrogen fertilizer input, in primary apple-producing area of the China's Loess Plateau, average annual N<sub>2</sub>O emissions in apple orchard (2.4 kg N<sub>2</sub>O ha<sup>-1</sup> yr<sup>-1</sup>) were 12% higher than those in wheat field (2.1 kg N<sub>2</sub>O ha<sup>-1</sup> yr<sup>-1</sup>) [7]. In Taihu region, field measurements also showed that soil N<sub>2</sub>O emissions from peach orchard soils (8.7–26.0 kg N ha<sup>-1</sup> yr<sup>-1</sup>) were much higher than those measured from rice-wheat system in the same region (0.4–1.1 kg N ha<sup>-1</sup> yr<sup>-1</sup>) and wheat-maize rotation in the North China Plain (<3.0 kg N ha<sup>-1</sup> yr<sup>-1</sup>) [8, 9]. As one of the native fruit trees in China, hawthorn has important economic, cultural, and medicine health values. In addition, hawthorn has become Chinese agricultural products with geographical indications, and is of a vital importance in rural revitalization. In 2021, there was an area of 86,700 ha hawthorn planted with a yield of 1.5 Mt [10]. Similar to the major orchard systems such as apple and peach, hawthorn cultivation is associated with high chemical and organic fertilization inputs. Besides, in hawthorn orchards, fertilizer is concentrated around fruit trees and topdressing generally occurs in hot and rainy summers, high N<sub>2</sub>O may be emitted from soils. Furthermore, to the best of our knowledge, no study has examined the GHG emissions in hawthorn orchard fields. Therefore, accurately measuring and mitigating GHG emissions from hawthorn orchard is important for alleviating the pressure of climate change caused by fruit planting growth without affecting the fruit production.

Biofertilizers, containing live microorganisms or bacteria and fungi, have gained prominence as eco-friendly fertilizers, because they can maintain soil fertility and stimulate crop growth [11, 12] while neither affect soil health nor pollute the environment [13]. Microalgae, a highly diverse group of photosynthetic microorganisms including prokaryotes (e.g. cyanobacteria) and eukaryotes (e.g. green algae), have attracted much attentions as a novel type of biofertilizers due to their excellent ability to soil improvement and crop productions [14]. Many studies have been done to indicate the performance of microalgae-based biofertilizer in enhancing growth and yield of staple crops, such as rice [15], wheat [16, 17], maize [18] and potato [19]. On the one hand, microalgae are an input of organic carbon source through photosynthesis and secretion of exopolysaccharides when applied to soil, thus improving soil fertility [17, 20]. Several studies stated that soil organic carbon contents were increased in the soil using microalgae biofertilizers [21–23]. On the other hand, microalgae biofertilizers application could increase soil available nitrogen, phosphorus, and potassium as well as soil microbial activities [24–26]. Microalgae biofertilizers also improve soil fertility and crop yields by facilitating soil aggregation, structure, and stability [22]. Besides, when added to soil as biofertilizers, microalgae can provide phytohormones (e.g. auxins, cytokinins, gibberellins), other bioactive compounds like amino-acids and polyamines, and micronutrients (e.g. Mg, Fe and Mn) to the plant [14, 27]. Moreover, as microalgae can produce a variety of bioactive substances that can influence plant growth through different organs (such as leaves and roots),

various concentrations and application modes may have different effects on crop growth. For example, *Chlorella vulgaris* (10%) suspensions increased more quality and yield of Swiss beet in foliar spray than root application [28]. Thus, microalgae biofertilizers could be applied by different methods to maximize effects on promoting plant growth and production.

Compared with the generally positive effects of microalgae biofertilizer on plant growth and soil improvement, the impact of microalgae biofertilizer on GHG emissions is less clear. A handful of studies reported that, soils inoculations with N<sub>2</sub>-fixing cyanobacteria significantly reduced CH<sub>4</sub> emissions compared to uninoculated soils in rice fields [29–31]. Shrestha et al. [32] found that N<sub>2</sub>O emissions in application of green microalgae biomass were 1.5 to 3-folds lower compared to urea fertilization in a wheat field, and ascribed to overall lower mineral nitrogen availability in soils fertilized by microalgae. However, other studies showed that applying green microalgae biomass significantly increased the emissions of soil N<sub>2</sub>O [33, 34] and CO<sub>2</sub> [33], but had no significant effect on CH<sub>4</sub> emissions [33]. Microalgae biofertilizers as organic source are likely to favor the growth of soil microbial populations including nitrifying and denitrifying microbes, and enhance soil respiration [35]. The improved respiration could consume soil oxygen and induce the formation of anaerobic soil microsites that boosting denitrification, resulting in high N<sub>2</sub>O production [36]. In addition, microalgae characterized by high concentrations of macronutrients is expected to favor nitrogen mineralization and nitrification [34]. Increased N<sub>2</sub>O emissions due to applying microalgae biofertilizers may be an undesirable tradeoff. Therefore, it is essential to investigate the effects of microalgae biofertilizers on GHG emissions from agricultural fields, for more comprehensively assessing their applications in agriculture.

In the present study, a field experiment was conducted by applying microalgae biofertilizer (a combination of live cyanobacteria and green microalgae) combined with conventional fertilization to a plant-soil system in a hawthorn orchard. The main objective was to assess the hawthorn yield and quality, GHG emissions, as well as soil organic carbon and nitrogen fractions and soil pH, under the effects of live microalgae-based biofertilizer applied at three doses and two modes. We also aimed to identify the most effective application strategy regarding the live microalgae-based biofertilizer in terms of hawthorn productivity and GHG emissions. Given the background of carbon neutrality target China has issued to achieve by 2060 [37], this study would advance integrated assessment of the environmental and agricultural effects of microalgae application as biofertilizers.

## Materials and methods

### Study site

The study was conducted at a commercial hawthorn orchard (*Crataegus pinnatifida* Bge.) in Jiangxian (35°28'48" N, 111°34'12" E), Shanxi Province, China. The study area has a temperate continental climate, with an average annual precipitation and temperature of 573.7 mm and 11.9°C, respectively. During the experiment, the total precipitation was 458.9 mm and approximately 60% of that occurred in July and August, and the daily temperature ranged from 3.5 to 34.8°C with an average value of 19.4°C (Fig 1). This was collected from a meteorological station adjacent to the experiment site located at Jiangxian county. The soil is Cinnamon Loess and is defined as a silt loam under the USDA texture classification system. At the beginning of the experiment, the soil properties of 0–20 cm depth were pH of 8.1, bulk density of 1.2 g cm<sup>-3</sup>, soil organic matter of 23.5 g kg<sup>-1</sup>, soil organic carbon of 13.5 g kg<sup>-1</sup>, total N of 1.1 g kg<sup>-1</sup>, alkali-hydrolyzed N of 77.9 mg kg<sup>-1</sup>, available P of 55.1 mg kg<sup>-1</sup>, and available K of 440.4 mg kg<sup>-1</sup>.

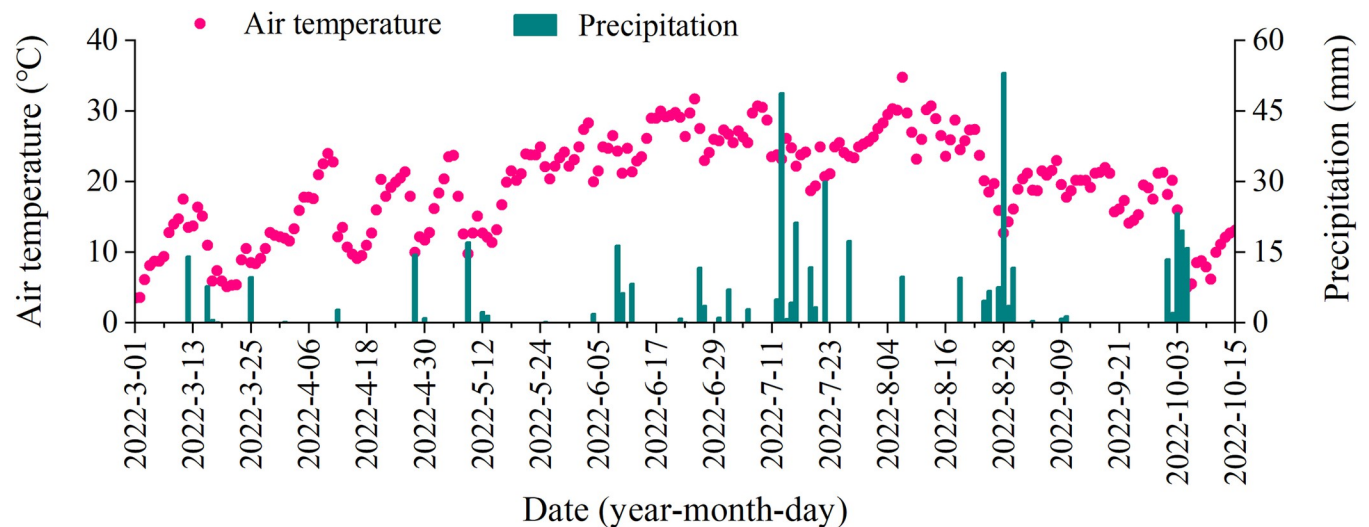

Fig 1. Air temperature and precipitation during the experiment.

<https://doi.org/10.1371/journal.pone.0307774.g001>

### Microalgae strains characterization

The live microalgae-based biofertilizer employed in this study was a combination of cyanobacteria (*Trichormus variabilis* strain) and green microalgae (*Auxenochlorella pyrenoidosa* strain) with a cell density of  $8 \times 10^6$  cells  $\text{mL}^{-1}$  [38], respectively, and was provided by Yuncheng Difulai Biotechnology Co., Ltd., Shanxi, China. The microalgae-based biofertilizer has the following properties: chlorophyll content =  $4.12 \mu\text{g mL}^{-1}$  (spectrophotometric method), pH = 7.09 (Mettler-Toledo pH meter), total organic carbon =  $49.52 \text{ g L}^{-1}$  (automated TOC Analyzer), total nitrogen =  $505.55 \text{ mg L}^{-1}$  (automated TOC Analyzer), total phosphorus =  $12.39 \text{ mg L}^{-1}$  (continuous Flow Analyzer).

*Trichormus variabilis* strain belongs to *Anabaena azotica*, with straight or filamentous chains. In nitrogen-rich conditions, the cells on the filament predominantly served as vegetative photosynthetic cells. However, in nitrogen-depleted condition, the vegetative cells differentiate to form heterocysts that are capable of fixing nitrogen. Because heterocysts contain the nitrogenase enzyme of nitrogen fixation, which can use the energy obtained through photosynthesis to reduce dinitrogen to ammonia [39]. In this way, vegetative cells and heterocysts behave with functional division. Specifically, nutrient cells provide carbon source to heteromorphic cells, and in turn heteromorphic cells provide nitrogen source to nutrient cells. The interdependence and interaction between the two cells are necessary to maintain the growth of filament and play a role in agricultural scenario. The *Anabaena azotica* can fix atmospheric  $\text{N}_2$  into plant-available nitrogen and release it through microbial nitrogen mineralization, which promote plant nitrogen uptake and plant growth [40].

*Auxenochlorella pyrenoidosa* strain, belonging to *Chlorella pyrenoidosa*, is a spherical single-cell organism, with round cell body in 3–5  $\mu\text{m}$  diameter and transparent cytoderm. It consists of a cup-shaped chloroplast and a powdered nucleus in intracellular protoplasts. During reproduction, the materials in the cell are divided into small pieces that are round with 0.3–0.7  $\mu\text{m}$  in diameter. Then the larvae scatter out after the maternal cytoderm breaks up. The *Auxenochlorella pyrenoidosa* is also involved in the production of *Chlorella* Growth Factor (CGF), which has the function of promoting cell growth, improving immunity and antioxidant activity [41]. It also can produce large amounts of nicotinamide, thiamine, vitamins B2 and B6, folic acid, inositol, and pantothenic acid. The microalgae biomass contains 57% protein,

2% fat, and 26% carbohydrates, which represent important sources of organic matter for soil microorganisms [27]. The microalgae *Chlorella pyrenoidosa* can be regarded as an accelerator agent in biodegradation of soil organic matter, and thereby aiding in the mineralization and solubilization of nutrients in soil, important for plant growth [42].

## Experimental design

The hawthorn trees (Dajinxing, a popular variety), spaced 4.5 m × 2.5 m (889 trees ha<sup>-1</sup>), were planted in March 2007. The field experiment consisted of seven treatments, each with three replicates in a fully randomized design, giving a total of 21 plots, each with an area of 110 m<sup>2</sup> (11 m × 10 m). The seven treatments were as follows:

1. CK, conventional fertilization, i.e. compound fertilizer combined with commercial organic fertilizer.
2. L-R, conventional fertilization plus low microalgae dose with root application.
3. M-R, conventional fertilization plus medium microalgae dose with root application.
4. H-R, conventional fertilization plus high microalgae dose with root application.
5. L-RL, conventional fertilization plus low microalgae dose equally divided into root application and foliar spray.
6. M-RL, conventional fertilization plus medium microalgae dose equally divided into root application and foliar spray.
7. H-RL, conventional fertilization plus high microalgae dose equally divided into root application and foliar spray.

Conventional fertilization received the combined application of chemical and organic fertilizers. Compound fertilizer (nitrogen-phosphorus (P<sub>2</sub>O<sub>5</sub>)-potassium (K<sub>2</sub>O): 17-17-17) was separately applied on 6 April (889 kg ha<sup>-1</sup>), 25 June (1334 kg ha<sup>-1</sup>) and 26 August (1334 kg ha<sup>-1</sup>) by surface band application in combination with irrigation of 60 mm approximately. Organic fertilizer (cow manure and crop residues) contained 28.3% organic carbon, 1.4% nitrogen, 1.1% P<sub>2</sub>O<sub>5</sub>, and 1.2% K<sub>2</sub>O, and was applied as basal fertilizer following the previous harvest by band application at about 15 cm depth near the root of hawthorn tree. The microalgae application was undertaken three times on 13 April, 30 June and 31 August at the same rate, 1.0, 2.5, and 5.0 L ha<sup>-1</sup> for low, medium and high microalgae dose each time, respectively. As for root application of microalgae, a mixture of microalgae and 5 L water per experimental plot was evenly spread over the soil surface within an around 0.5 m radius of the hawthorn tree using a graduated watering can. For foliar spray, a mixture of microalgae and 3 L water per experimental plot was uniformly sprayed on the leaf surface with a graduated watering can. Simultaneously, control plots (single conventional fertilization) were added with the same amount of water as microalgae treatments. The total application rates of conventional fertilization and microalgae were showed in Table 1. Other management measures, including irrigation, pest, and weed control were consistent with local agronomic practices, and kept same for all the treatments.

## GHG emission measurements

In each experimental plot, in-situ GHG fluxes was measured using a static closed chamber method [43], starting from June to September of 2022 when hawthorn showed vigorous growth. Briefly, the static chambers were cylindrical, 30 cm in diameter and 20 cm in height.



Table 1. Application rates of conventional fertilization and microalgae across treatments.

| Treatment | Compound fertilizer<br>(kg ha <sup>-1</sup> ) |                         |                                             |                              | Organic fertilizer<br>(kg ha <sup>-1</sup> ) |                         |                                             |                              | Microalgae<br>(L ha <sup>-1</sup> ) |
|-----------|-----------------------------------------------|-------------------------|---------------------------------------------|------------------------------|----------------------------------------------|-------------------------|---------------------------------------------|------------------------------|-------------------------------------|
|           | Rate                                          | Specific nutrient input |                                             |                              | Rate                                         | Specific nutrient input |                                             |                              |                                     |
|           |                                               | Nitrogen                | Phosphorus (P <sub>2</sub> O <sub>5</sub> ) | Potassium (K <sub>2</sub> O) |                                              | Nitrogen                | Phosphorus (P <sub>2</sub> O <sub>5</sub> ) | Potassium (K <sub>2</sub> O) |                                     |
| CK        | 3557                                          | 605                     | 605                                         | 605                          | 3000                                         | 42                      | 33                                          | 36                           | 0                                   |
| L-R       | 3557                                          | 605                     | 605                                         | 605                          | 3000                                         | 42                      | 33                                          | 36                           | 3.0                                 |
| M-R       | 3557                                          | 605                     | 605                                         | 605                          | 3000                                         | 42                      | 33                                          | 36                           | 7.5                                 |
| H-R       | 3557                                          | 605                     | 605                                         | 605                          | 3000                                         | 42                      | 33                                          | 36                           | 15.0                                |
| L-RL      | 3557                                          | 605                     | 605                                         | 605                          | 3000                                         | 42                      | 33                                          | 36                           | 3.0                                 |
| M-RL      | 3557                                          | 605                     | 605                                         | 605                          | 3000                                         | 42                      | 33                                          | 36                           | 7.5                                 |
| H-RL      | 3557                                          | 605                     | 605                                         | 605                          | 3000                                         | 42                      | 33                                          | 36                           | 15.0                                |

<https://doi.org/10.1371/journal.pone.0307774.t001>

Permanent rings were inserted into the soil to 10 cm depth as a pedestal for the chambers. A temperature sensor was fixed to the mid-position of each closed chamber to record the air temperature inside.

Gas sampling was undertaken once a week between 9:00 and 11:00 a.m. to minimize the effect of diurnal temperature variation on gas fluxes. During fertilization or rainfall (>10 mm), the sampling intervals decreased to 2 or 3 days. Chambers were closed for 20 min, and gas samples were collected from its headspace at 0 and 20 min respectively. The concentrations of N<sub>2</sub>O, CH<sub>4</sub> and CO<sub>2</sub> in gas samples were analyzed using a gas chromatograph (Agilent 7890B, Agilent Technologies Inc., CA, USA) equipped with an electron capture detector (ECD) and a flame ionization detector (FID). Cumulative N<sub>2</sub>O, CH<sub>4</sub> and CO<sub>2</sub> emissions were determined by linear interpolation between sampling dates, assuming that the fluxes followed a linear trend during the unmeasured periods [44]. Soil N<sub>2</sub>O, CH<sub>4</sub> and CO<sub>2</sub> emissions intensity was calculated by dividing the cumulative N<sub>2</sub>O, CH<sub>4</sub> and CO<sub>2</sub> emissions by the hawthorn yield, respectively. In addition, to assess the comprehensive greenhouse effect and hawthorn output at the expense of GHG emissions, GHG emissions were converted to global warming potential (GWP) values and GHG intensity. The GWP was obtained by the sum of cumulative N<sub>2</sub>O, CH<sub>4</sub> and CO<sub>2</sub> emissions in CO<sub>2</sub> equivalents (CO<sub>2</sub>-eq) with conversion factors (on a 100-year time horizon) of 273 and 28 for N<sub>2</sub>O and CH<sub>4</sub>, respectively [1]. The GHG intensity was calculated the CO<sub>2</sub> equivalents per unit of hawthorn yield [45].

### Hawthorn fruit yield and quality components

In middle October of 2022, the hawthorn fruits were collected manually in each experimental plot. Both the total yield and single fruit weight were determined. Total vitamin C, reduced vitamin C, soluble sugars and reducing sugars were selected, to represent hawthorn fruit quality, determined by molybdenum blue spectrophotometry, 2,6-dichloroindophenol titration, anthrone method and 3,5-dinitrosalicylic acid method, respectively, referring to the Experimental Guidance of Plant Physiology.

This study is complied with relevant institutional, national, and international guidelines and legislation. During the determination of fruit yield and quality components, the collection of hawthorn fruits and used in this study are obtained relevant permissions.

### Soil sampling and measurements

At harvest, five separate soil cores were collected in each experimental plot at 0–10 and 10–20 cm depth, and the soils were thoroughly mixed into a composite sample for each depth,

yielding a total of 42 soil samples (7 treatments  $\times$  3 replicates  $\times$  2 depths). All soil samples were removed visible plant roots with tweezers and passed through a 2-mm sieve, and each soil sample was split into two parts. One part was kept at 4°C immediately, and the other part was air-dried and then stored at room temperature.

Soil organic carbon (SOC) was determined by wet digestion with  $\text{H}_2\text{SO}_4\text{-K}_2\text{CrO}_7$ , and total nitrogen (TN) was measured using a C/N element analyzer (Elementar, Germany). The concentrations of ammonium nitrogen ( $\text{NH}_4^+\text{-N}$ ) and nitrate nitrogen ( $\text{NO}_3^-\text{-N}$ ) were determined using an AA3 continuous-flow analyzer (Bran + Luebbe GmbH, Norderstedt, Germany) after extraction with 2 mol  $\text{L}^{-1}$  KCl in 1:5 soil to solution ratio. Soil microbial biomass carbon (MBC) and microbial biomass nitrogen (MBN) were determined by the fumigation-extraction method [46] and a TOC Analyser (GE Sievers InnovOx, Boulder, USA). In addition, the organic carbon and nitrogen from the non-fumigated soils were considered to be dissolved organic carbon (DOC) and total dissolved nitrogen (TDN), and dissolved organic nitrogen (DON) was calculated as TDN minus  $\text{NH}_4^+\text{-N}$  and  $\text{NO}_3^-\text{-N}$ . The soil pH was measured using a portable pH meter (Mettler Toledo, Switzerland) with a soil to  $\text{CaCl}_2$  solution volume ratio of 1:2.5.

## Statistical analyses

All data were analyzed using Excel 2016 and the SPSS 20 statistical package for Windows (SPSS China). One-way analysis of variance (ANOVA) with a least significant difference (LSD) test ( $P < 0.05$ ) was used to determine significant differences among treatments in GHG emissions, soil organic carbon and nitrogen fractions as well as soil pH, hawthorn fruit yield and quality. Two-way ANOVA were used to analyze the effects of treatment, sampling date and their interactions on GHG fluxes, as well as the effects of treatment, soil depth and their interactions on soil organic carbon and nitrogen fractions as well as soil pH.

## Results

### Hawthorn fruit yield and quality

The yield of hawthorn, ranging from 44.3 to 57.4 t  $\text{ha}^{-1}$ , was 15.7%–29.6% higher in microalgae application than in CK, with a maximal increment in M-R treatment, while no significant difference was found among different microalgae application doses and modes (Fig 2A). The single fruit weight, which ranged between 14.6 and 15.6 g, was not significantly influenced by microalgae application (Fig 2B).

The contents of total and reduced vitamin C were respectively in the range of 4.8–6.3 and 2.2–3.5 mg per 100 g across treatments, and was not significantly affected by microalgae application (Fig 2C and 2D). The contents of soluble and reducing sugars were respectively in the range of 77.4–110.7 and 44.2–62.1  $\mu\text{g mg}^{-1}$  across treatments, and were significantly increased in H-R and H-RL treatments compared with CK (Fig 2E and 2F).

### GHG emissions

The  $\text{N}_2\text{O}$  fluxes were positive from all treatments, indicating that the hawthorn orchard soil was a net source of  $\text{N}_2\text{O}$  (Fig 3A). The  $\text{N}_2\text{O}$  fluxes, ranging from 0.9 to 22.6 g  $\text{ha}^{-1} \text{d}^{-1}$  with an average of 5.1 g  $\text{ha}^{-1} \text{d}^{-1}$ , were significantly affected by treatment, sampling date and their interactions. Cumulative  $\text{N}_2\text{O}$  emissions were 0.5–0.7 kg  $\text{ha}^{-1}$ , and were not significantly enhanced by microalgae application except H-R treatment (Fig 4A). Moreover, cumulative  $\text{N}_2\text{O}$  emissions in M-R treatment were significantly lower by 20.9% than in H-R treatment. As

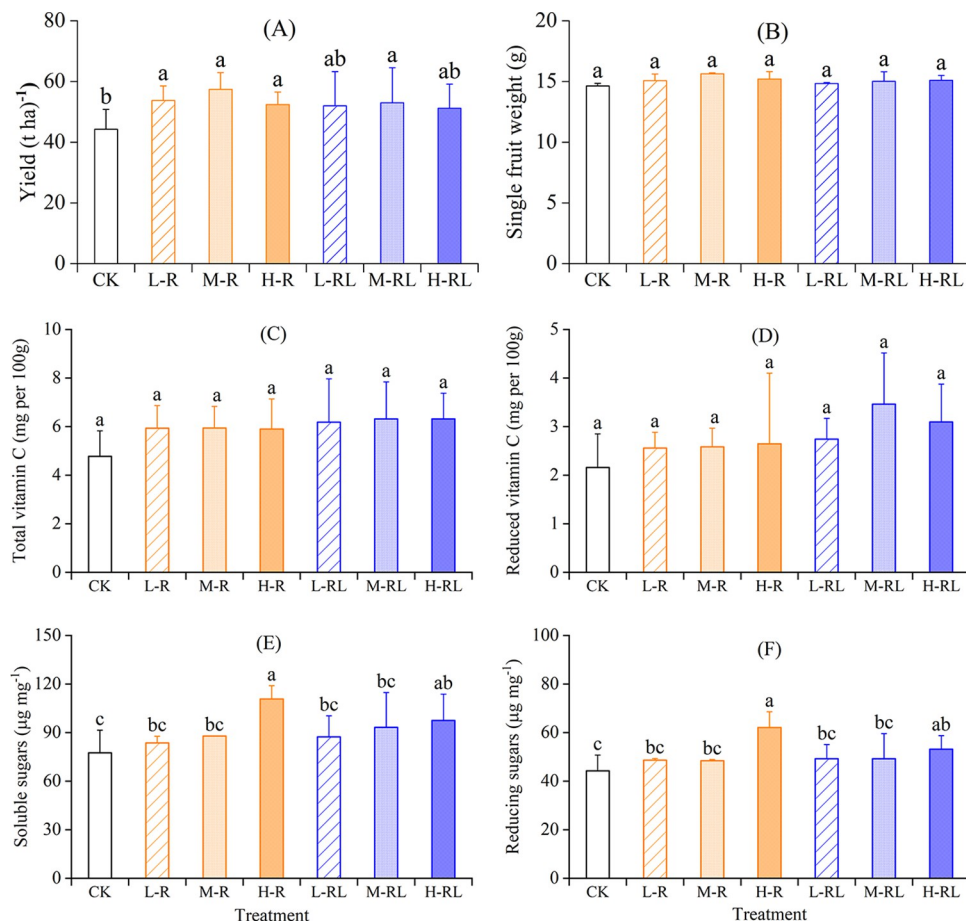

**Fig 2.** Hawthorn yield (A), single fruit weight (B), total vitamin C (C), reduced vitamin C (D), soluble sugars (E) and reducing sugars (F) under different treatments. Error bars indicate standard deviation of three replicates. Different lowercase letters indicate significant differences among treatments at  $P < 0.05$ .

<https://doi.org/10.1371/journal.pone.0307774.g002>

for N<sub>2</sub>O emission intensity, it was 9.3–12.8 mg kg<sup>-1</sup> yield, and was significantly lower by 18.9% and 27.8% in M-R treatment than CK and H-R treatment, respectively (Fig 4B).

The CH<sub>4</sub> fluxes ranged from -28.5 to 17.4 g ha<sup>-1</sup> d<sup>-1</sup> with an average of -4.3 g ha<sup>-1</sup> d<sup>-1</sup> (Fig 3B), and cumulative CH<sub>4</sub> emissions was -0.7 to -0.2 kg ha<sup>-1</sup> (Fig 4C). This indicated that the soil acted as a small sink for atmospheric CH<sub>4</sub>. Microalgae in root application significantly reduced the cumulative CH<sub>4</sub> emissions by 1.5–2.3 folds, with the largest reduction in L-R treatment. A similar effect of microalgae application was also observed in CH<sub>4</sub> emission intensity (Fig 4D).

Soil CO<sub>2</sub> fluxes ranged from 20.1 to 160.4 kg ha<sup>-1</sup> d<sup>-1</sup> with an average of 62.0 kg ha<sup>-1</sup> d<sup>-1</sup>, and were remarkably affected by treatment and sampling date (Fig 3C). Cumulative CO<sub>2</sub> emissions were 6.0–8.4 t ha<sup>-1</sup>, and not significantly influenced by microalgae application (Fig 4E). The CO<sub>2</sub> emission intensity ranged between 116.0 and 176.2 g kg<sup>-1</sup> yield, and were significantly lower by 29.9% and 34.2% in M-R and L-RL treatments than CK, respectively (Fig 4F).

The GWP, ranging between 6.2 and 8.6 t CO<sub>2</sub>-eq ha<sup>-1</sup>, was not significantly different among treatments (Fig 4G). While the GHG intensity, varying from 118.9 to 179.2 g CO<sub>2</sub>-eq kg<sup>-1</sup> yield, decreased by 6.4%–33.6% as compared to CK, and M-R and L-RL treatments had higher and significant decreases (Fig 4H).



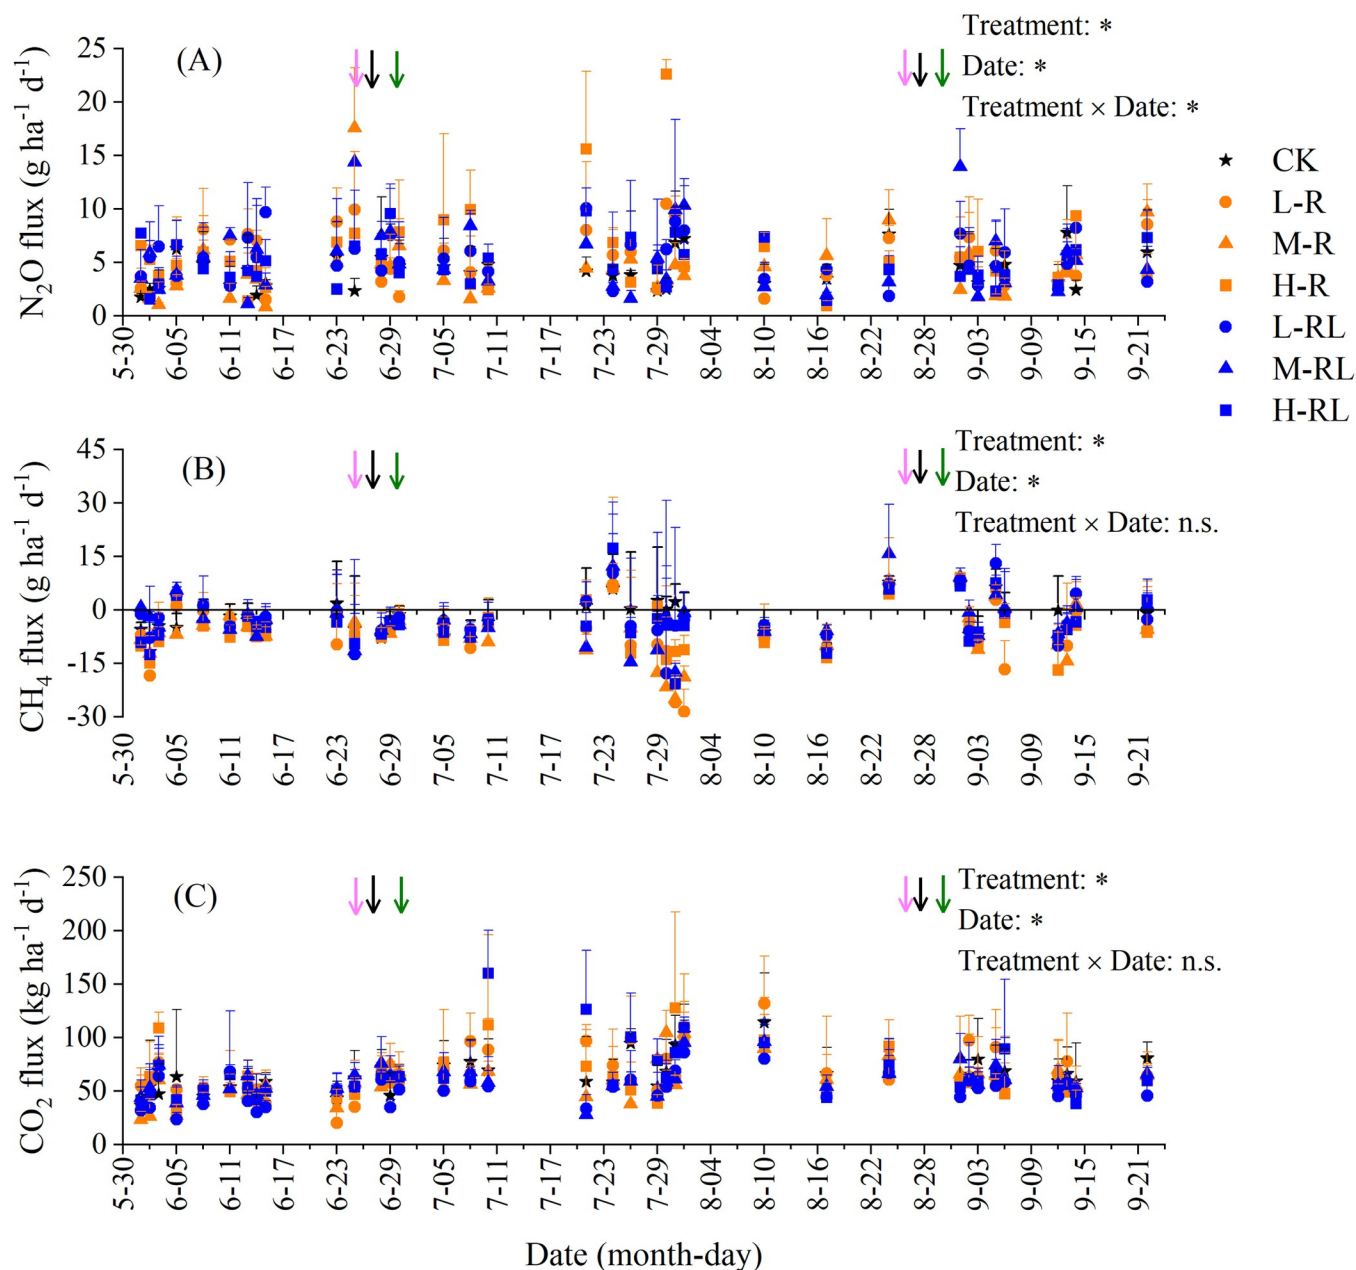

**Fig 3.** Variation in fluxes of soil  $N_2O$  (A),  $CH_4$  (B) and  $CO_2$  (C) from different treatment plots in the hawthorn orchard field from June to September of 2022. The pink, black and green arrows indicate conventional fertilization, irrigation and microalgae application dates, respectively. Error bars indicate standard deviation of three replicates. \*: significant at  $P < 0.05$ ; n.s.: no significant.

<https://doi.org/10.1371/journal.pone.0307774.g003>

### Soil organic carbon fractions and soil pH

The SOC contents ranged from 11.8 to 13.6  $g\ kg^{-1}$  and 8.2 to 9.4  $g\ kg^{-1}$  in 0–10 cm and 10–20 cm, respectively, and was significantly higher in 0–10 cm than that in 10–20 cm for all the treatments (Fig 5A; Table 2,  $P < 0.05$ ). Compared with CK, microalgae application increased SOC content by 4.1%–14.8% except for H-R treatment of 10–20 cm, although not significantly.

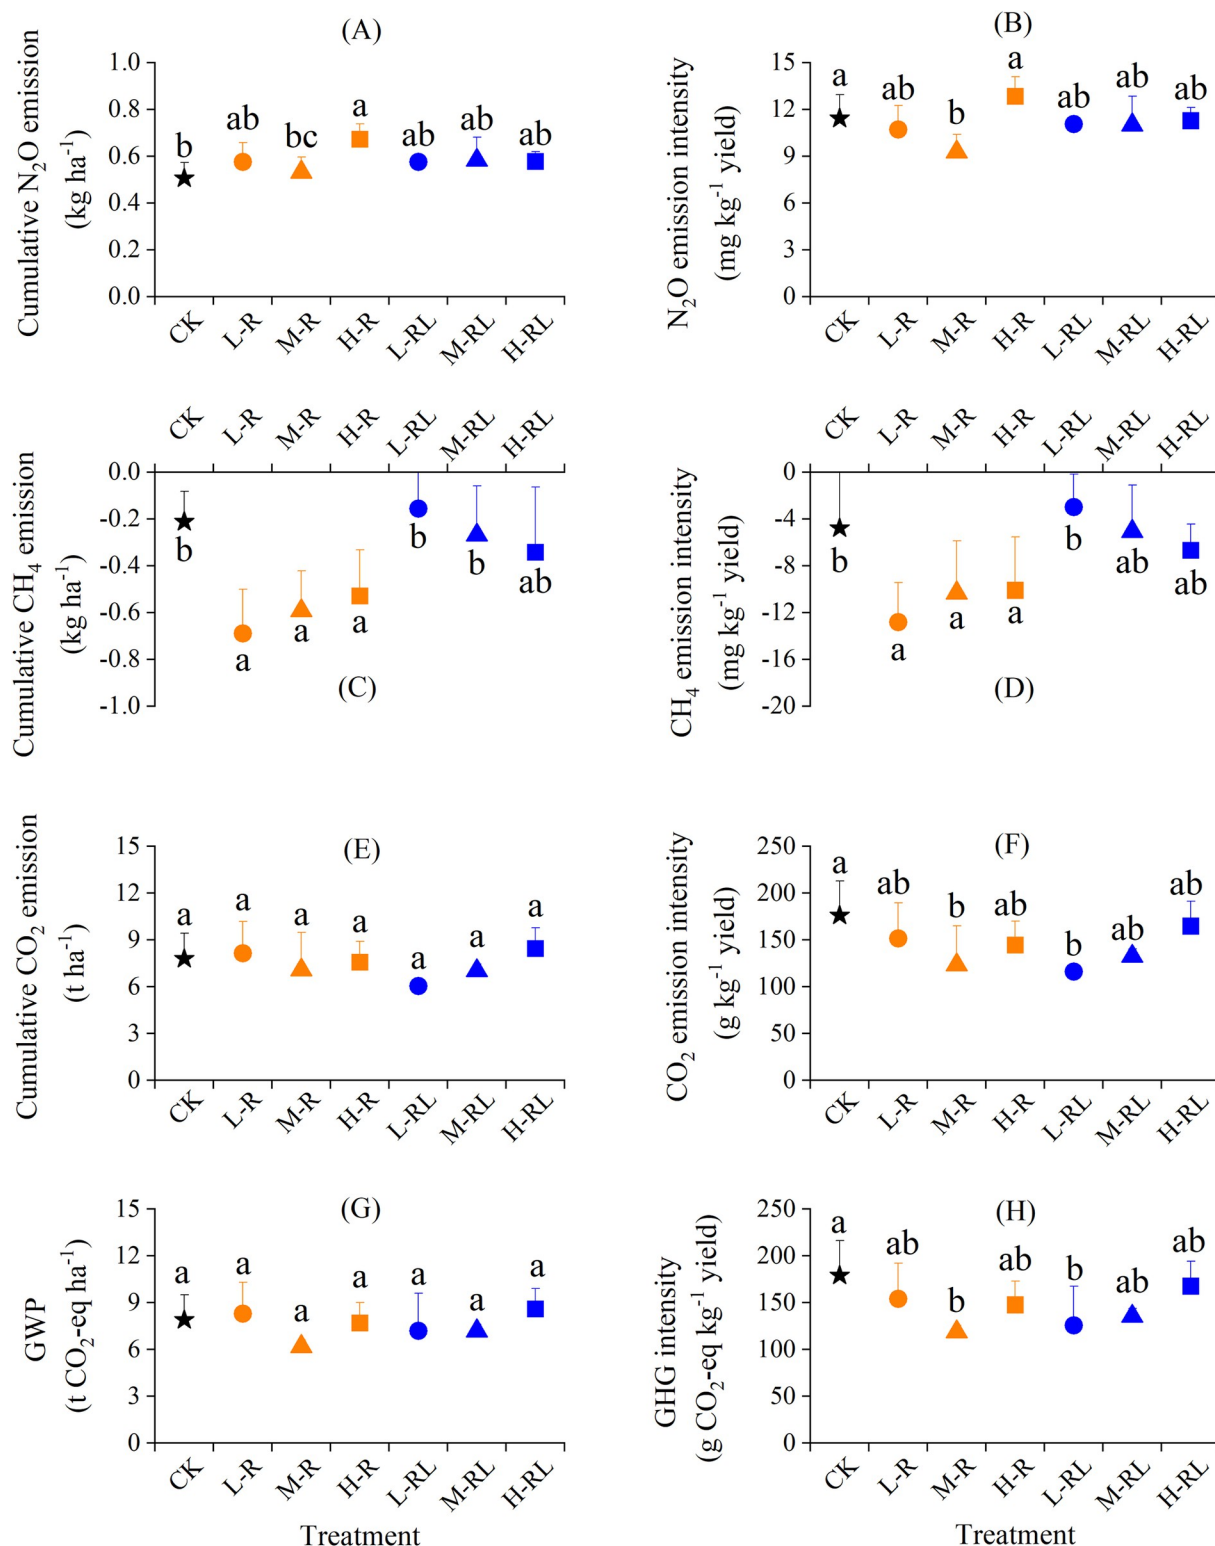

**Fig 4.** Cumulative emissions and emission intensity of  $N_2O$  (A, B),  $CH_4$  (C, D) and  $CO_2$  (E, F) as well as GWP (G) and GHG intensity (H) in different treatments. Error bars indicate standard deviation of three replicates. Different lowercase letters indicate significant differences among treatments at  $P < 0.05$ .

<https://doi.org/10.1371/journal.pone.0307774.g004>

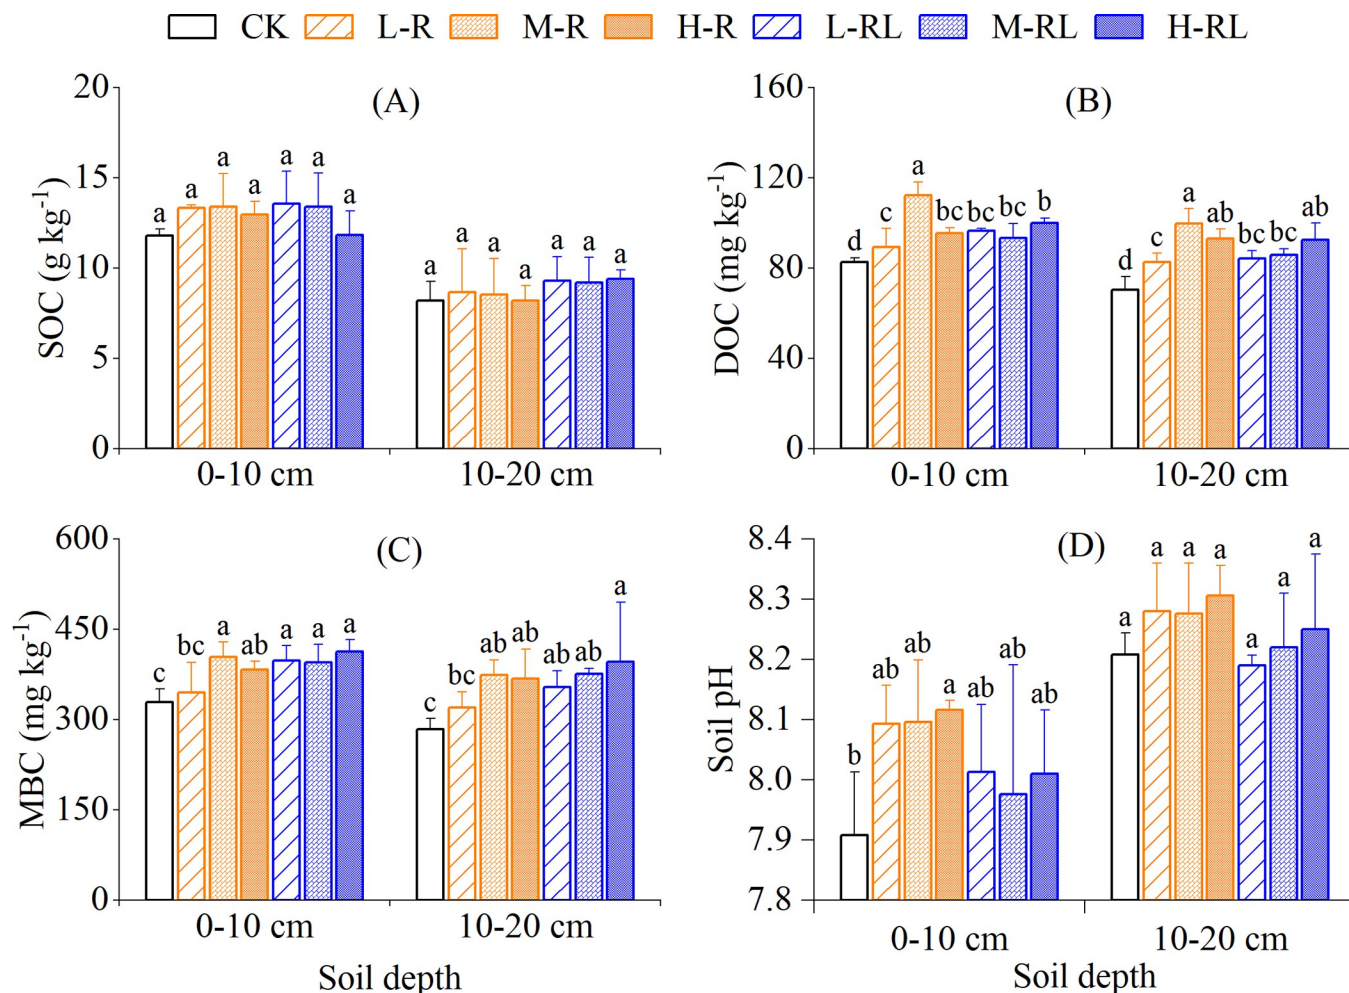

**Fig 5.** Contents of SOC (A), DOC (B) and MBC (C) as well as soil pH (D) at 0–10 cm and 10–20 cm soil depth in different treatments. Error bars indicate standard deviation of three replicates. Different lowercase letters indicate significant differences among treatments in each soil depth at  $P < 0.05$ .

<https://doi.org/10.1371/journal.pone.0307774.g005>

Treatment and soil depth had strong effects on DOC and MBC contents, but their interaction effect was not observed (Table 2). Compared with CK, microalgae application significantly increased DOC content by 8.1%–35.9% and 19.5%–41.4% in 0–10 cm and 10–20 cm, respectively, with a maximal increment in M-R treatment that was significantly higher than other treatments (Fig 5B). Except for L-R treatment, microalgae application significantly increased MBC content by 16.1%–25.4% and 24.6%–39.2% in 0–10 cm and 10–20 cm as compared to CK, respectively, with a maximal increment in H-RL treatment (Fig 5C).

**Table 2.** ANOVA results ( $P$ -values) for the effects of treatment, soil depth and their interactions on soil carbon and nitrogen fractions as well as soil pH. Significant effects ( $P < 0.05$ ) are highlighted in bold.

|                      | df | SOC          | DOC          | MBC          | $\text{NH}_4^+-\text{N}$ | $\text{NO}_3^--\text{N}$ | DON          | MBN          | pH           |
|----------------------|----|--------------|--------------|--------------|--------------------------|--------------------------|--------------|--------------|--------------|
| Treatment            | 6  | 0.362        | <b>0.000</b> | <b>0.000</b> | <b>0.021</b>             | 0.156                    | <b>0.044</b> | 0.824        | 0.252        |
| Soil depth           | 1  | <b>0.000</b> | <b>0.000</b> | <b>0.013</b> | 0.652                    | <b>0.000</b>             | <b>0.005</b> | <b>0.029</b> | <b>0.000</b> |
| Treatment×Soil depth | 6  | 0.682        | 0.417        | 0.962        | 0.735                    | 0.390                    | 0.852        | 0.908        | 0.953        |

<https://doi.org/10.1371/journal.pone.0307774.t002>



The soil pH increased with soil depth, ranging from 7.91–8.12 in 0–10 cm to 8.19–8.31 in 10–20 cm depth (Fig 5D; Table 2,  $P < 0.05$ ). Compared with CK, H-R treatment markedly increased soil pH by 0.21 units in 0–10 cm depth. However, the difference was not significant among treatments in 10–20 cm depth.

### Soil nitrogen fractions

Treatments had strong effects on  $\text{NH}_4^+$ -N content (Table 2). Compared with CK, only M-R treatment significantly increased  $\text{NH}_4^+$ -N content by 92.0% and 48.1% in 0–10 cm and 10–20 cm, respectively, and was significantly higher than H-R treatment in both soil depth (Fig 6A).  $\text{NO}_3^-$ -N content was significantly higher in 0–10 cm than that in 10–20 cm for all the treatments, but there was no remarkable difference among treatments, except M-R, H-R and M-RL treatments in 0–10 cm depth that showed a significant increase compared with L-R treatment (Table 2, Fig 6B).

Both treatments and soil depth had strong effects on DON content (Table 2). Compared with CK, only M-R treatment significantly increased DON content by 25.2% and 17.9% in 0–10 cm and 10–20 cm, respectively, and was significantly higher than M-RL treatment in 0–10

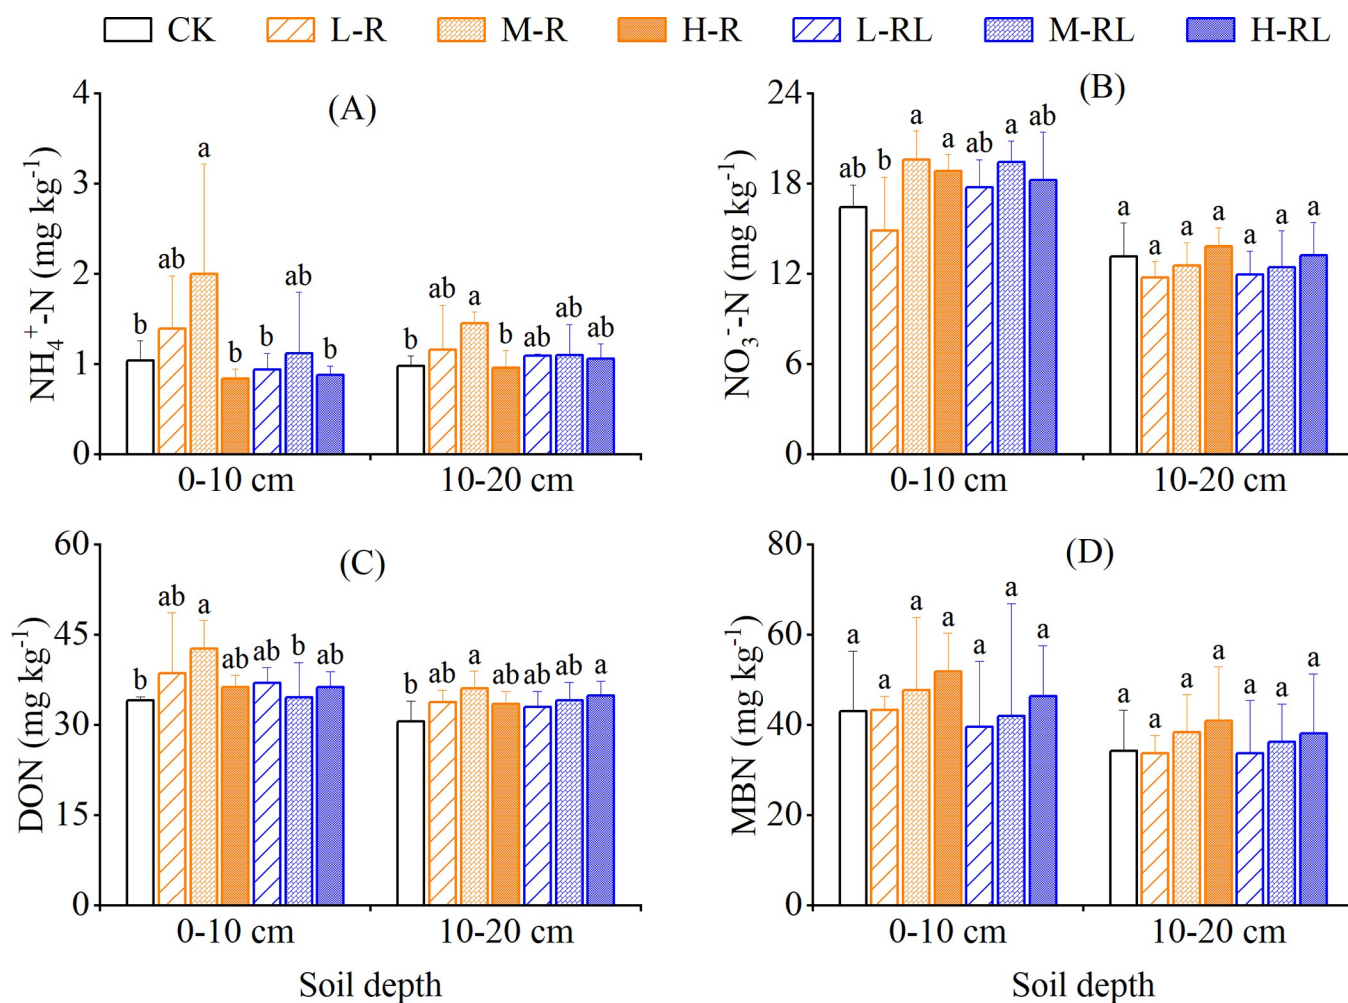

**Fig 6.** Contents of  $\text{NH}_4^+$ -N (A),  $\text{NO}_3^-$ -N (B), DON (C) and MBN (D) in 0–10 cm and 10–20 cm soil depth in different treatments. Error bars indicate standard deviation of three replicates. Different lowercase letters indicate significant differences among treatments in each soil depth at  $P < 0.05$ .

<https://doi.org/10.1371/journal.pone.0307774.g006>

cm depth (Fig 6C). As for MBN content, it was significantly influenced by soil depth, but there was no significant difference among treatments (Table 2, Fig 6D).

## Discussions

### Fruit productivity and quality

The yield of hawthorn fruit was significantly improved by microalgae application in relative to single conventional fertilization, with the largest increment in M-R treatment (Fig 2A). A number of previous studies have also reported the beneficial effects of microalgae-based bio-fertilizer on plant growth and yield [15, 17, 19, 47]. Microalgae can provide organic nutrients through photosynthesis and cell lysates, leading to stimulation of microbial activity that facilitated mineralization and mobilization of nutrients for plant growth [27]. In addition, after adding nitrogen-fixing cyanobacteria members, such as *Anabaena azotica* employed in this study, the enhancement of soil microbial activity accelerates soil nitrogen transformation and promoted nitrogen mineralization [14]. As a consequence, the breakdown of microalgae may lead to releasing various nutrients and increase soil mineralization [26], which was beneficial to the improvement of soil available nitrogen [48]. Our results showed that M-R treatment significantly increased soil  $\text{NH}_4^+$ -N and DON contents in 0–10 cm soil depth (Fig 6A and 6C). Soil DON was an important pool for nitrogen transformations and a potential source of plant nitrogen nutrition [49], because the main route to produce  $\text{NH}_4^+$ -N in soil was likely through extracellular enzymes that first convert insoluble organic nitrogen into soluble organic nitrogen [50]. This may reflect in a higher soil DON coincided with the higher  $\text{NH}_4^+$ -N and fruit yield in M-R treatment. On the other hand, microalgae had the ability to supply micronutrients (e.g. iron, manganese, copper and zinc) and phytohormones (e.g. auxins, gibberellins and cytokinins) [17, 51], which were related to plant growth and thus could enhance plant productivity. The significant increase in the contents of soluble and reducing sugars in H-RL treatment (Fig 2E and 2F), might be related to the abundant chlorophyll, phytohormone, and photosynthate resulting from microalgae proliferation [15, 52–54]. In addition, foliar spray of microalgae has been reported to improve the water use efficiency and stomatal functioning in plants [53]. Hajnal-Jafari et al. [28] reported that foliar spray of chlorella suspensions acted more excellently in enhancing the quality and yield of Swiss beet than root application of chlorella suspensions. However, in this study, there was no significant difference between root application and foliar spray at the same total microalgae doses regarding the hawthorn fruit yield and quality.

### Linking soil carbon and nitrogen fractions to GHG emissions

Various practices and technologies have been attempted to decrease  $\text{N}_2\text{O}$  emissions from fruit orchards [6]. Microbiological technologies to mitigate soil  $\text{N}_2\text{O}$  emissions have been achieved through inoculation with  $\text{N}_2\text{O}$ -reducing denitrifiers to roots, soils or fertilizers [55, 56]. Our results showed that microalgae application did not increase  $\text{N}_2\text{O}$  emissions from hawthorn orchard soil compared with conventional fertilization alone, except H-R treatment (Figs 3A and 4A). A recent study showed that  $\text{N}_2\text{O}$  emissions were 1.5–3.0 times lower in wheat soils fertilized by green microalgae compared to inorganic fertilizer, and ascribed it mainly to lower soil inorganic nitrogen availability with microalgae application [32]. In this study, except for soil  $\text{NH}_4^+$ -N of M-R treatment, the microalgae application did not significantly change both  $\text{NH}_4^+$ -N and  $\text{NO}_3^-$ -N (Fig 6A and 6B). Unfortunately, we did not measure soil  $\text{NH}_4^+$ -N and  $\text{NO}_3^-$ -N at the peak of  $\text{N}_2\text{O}$  emissions, due to logistical reasons. In contrast, the work of Castro et al. [33] showed a 5-time increase in  $\text{N}_2\text{O}$  emissions under microalgal biofilm treatment compared with inorganic fertilizer, and attributed to larger labile organic carbon. Here, we



indeed observed significant increases of soil labile carbon (i.e. DOC & MBC) in microalgae application (Fig 5B and 5C). Moreover, the effects of microalgae application on soil microbes responsible for  $\text{N}_2\text{O}$  production may influence the observed  $\text{N}_2\text{O}$  emissions. While Suleiman et al. [34] reported that no significant shift was found in the abundances of ammonia-oxidizing bacteria and archaea as well as denitrifying gene *nirS* and *nirK* in soils applied with microalgae. This suggests that the changes in soil microbes on biofertilizer may be temporary because of trend of the microbial community resilience [57]. In the present study with alkaline soil, H-R treatment resulted in an increase in  $\text{N}_2\text{O}$  emissions compared with CK (Fig 4A), which could be partly ascribed to the higher soil pH in H-R treatment (Fig 5D). In alkaline agricultural soils under aerobic conditions, autotrophic nitrification was the dominant process for  $\text{N}_2\text{O}$  production, and an increase in soil pH could stimulate autotrophic nitrification and  $\text{N}_2\text{O}$  emissions [58, 59]. Additionally, live microalgae cells were likely able to synthesize  $\text{N}_2\text{O}$  during their proliferation in the presence of available nitrogen source [60], and the microalgae-derived  $\text{N}_2\text{O}$  production rates were linearly correlated to microalgal concentrations [61]. In this regard, the microalgae biofertilizer should consider and determine the appropriate dose to be used to minimize soil  $\text{N}_2\text{O}$  emissions.

As the observed negative values of  $\text{CH}_4$  emissions (Fig 3B), the hawthorn orchard soil could act as an atmospheric  $\text{CH}_4$  sink, thanks to  $\text{CH}_4$  absorption or oxidation just like other well-drained upland soils [62, 63]. We observed that  $\text{CH}_4$  uptake was significantly increased by 1.5–2.3 times in soil with microalgae by root application as compared to single conventional fertilization (Fig 4C), which was inconsistent with the results of Castro et al. [33]. They showed that the presence of microalgal biofilm did not significantly influence  $\text{CH}_4$  emissions. Soil available carbon was an important substrate for  $\text{CH}_4$  production via methanogens [64]. The result of this study did observe significant increases in soil DOC with microalgae application (Fig 5B). However, not all the  $\text{CH}_4$  produced ends up in the atmosphere, because  $\text{CH}_4$  oxidizing bacteria (methanotrophs) is able to oxidize  $\text{CH}_4$  in the presence of oxygen. During microalgae photosynthesis, oxygen released can diffuse into the soil and result in aerobic soil microsites [65], which may decrease production and/or increase oxidation of  $\text{CH}_4$  especially in the presence of cyanobacteria [66]. Furthermore, previous studies found that  $\text{CH}_4$  oxidation was positively and significantly correlated with  $\text{NO}_3^-$ -N content [62, 67], because  $\text{NO}_3^-$ -N could promote the synthesis of enzymes involved in the  $\text{CH}_4$  oxidation process [68]. Therefore, we presumed that microalgae biofertilizer in root application may strengthen the population and activity of methanotrophs, and thus contributed to the higher  $\text{CH}_4$  uptake compared to conventional fertilization alone.

Regarding soil  $\text{CO}_2$  emissions, previous studies indicated that microalgae could induce greater microbial decomposition of organic matter or respiration with associated higher  $\text{CO}_2$  production [33, 34, 69]. In our study, microalgae application did not increase soil  $\text{CO}_2$  emissions (Fig 4E and 4F), although it did significantly increase soil microbial biomass (i.e. MBC) (Fig 5C). Considering that the live microalgae had the ability to consume  $\text{CO}_2$  via photosynthesis in the daytime [70], and might contribute to organic carbon accumulation through the proliferation of cells and the excretion of organic soil-binding metabolites [71, 72]. For example, Tu et al. [73] reported that the  $\text{CO}_2$  fixation rate of *Chlorella pyrenoidosa* was  $1.2 \text{ g L}^{-1}$  and it increased the dry biomass by around 85%. Additionally, earlier research stated that microalgae biofertilizer could result in a significant increase of SOC and a further increase when combined with organic fertilizer [21]. We also observed an increasing trend of SOC in the soils with microalgae biofertilizer (Fig 5A), albeit not significantly due to the short timescale of microalgae application in relative to SOC turnover [74]. It is anticipated that long-time microalgae application may retain more carbon in the soil through carbon sequestration process [23] and that may not yield an increase in  $\text{CO}_2$  emissions to atmosphere.

Taken together, our results showed that application of microalgae biofertilizer did not increase comprehensive greenhouse effect (i.e. GWP, Fig 4G). Additionally, linking hawthorn yield with GWP indicated that, microalgae application decreased GHG intensity and showed a significant decrease in M-R and L-RL treatments compared with CK (Fig 4H). The findings of this study suggested that applying microalgae could cause an increase in hawthorn yield and did not increase the GHG emissions cost, especially in M-R treatment.

## Conclusions

Our study showed that conventional fertilization combined with microalgae-based biofertilizer improved the hawthorn yield by 15.7%–29.6%, with a maximal increment at medium dose by root application. While microalgae application did not concomitantly increase the GHG emissions from hawthorn orchard soil in the view of GWP and GHG intensity. Apart from higher N<sub>2</sub>O at high dose by root application, microalgae significantly increased CH<sub>4</sub> uptake by 1.5–2.3 times in root application. Moreover, microalgae application showed an increasing trend in SOC content, though not significantly due to the short timescale of the experiment, and significantly increased the labile organic carbon content. Overall, these results indicated that the medium microalgae dose with root application had a high fruit yield with low GHG emissions cost. The study highlighted the promise of the live microalgae as an effectively green biofertilizer, which could be expected to reduce GHG emissions in the context of lowering chemical fertilizer rates and remain fruit yield, recommending applying at medium microalgae dose with root application.

## Acknowledgments

We are thankful to the editors and anonymous reviewers for meticulously going through the manuscript and for their great suggestions.

## Author Contributions

**Conceptualization:** Fen Ma, Yingchun Li.

**Data curation:** Shifeng Li, Kangjie Wang, Kangxi Qin, Jian Duan, Yutong Liu, Yuxuan Xu.

**Formal analysis:** Fen Ma, Yingchun Li.

**Investigation:** Fen Ma, Yingchun Li, Xue Han, Kuo Li, Mingyue Zhao.

**Project administration:** Yingchun Li, Xue Han.

**Supervision:** Yingchun Li.

**Writing – original draft:** Fen Ma.

**Writing – review & editing:** Fen Ma, Yingchun Li, Liping Guo.

## References

1. IPCC. Climate Change 2021: the Physical Science Basis. Contribution of Working Group I to the Sixth Assessment Report of the Intergovernmental Panel on Climate Change; Cambridge University Press, Cambridge, UK and New York, USA., 2021.
2. Florio A.; Maienza A.; Dell'Abate M.T.; Stazi S.R.; Benedetti A. Changes in the activity and abundance of the soil microbial community in response to the nitrification inhibitor 3,4-dimethylpyrazole phosphate (DMPP). *J. Soil Sediment* 2016, 16, 2687–2697.
3. FAO. FAOSTAT: FAO statistical databases. Food and Agriculture Organization of the United Nations 2021.

4. NDRC. National Agricultural Cost-Benefit Data in 2020. National Development and Reform Commission of China (NDRC), 2021.
5. Gao B.; Huang T.; Ju X.T.; Gu B.J.; Huang W.; Xu L.L.; et al. Chinese cropping systems are a net source of greenhouse gases despite soil carbon sequestration. *Global Change Biol.* 2018, 24, 5590–5606. <https://doi.org/10.1111/gcb.14425> PMID: 30118572
6. Gu J.X.; Nie H.H.; Guo H.J.; Xu H.H.; Gunnathorn T. Nitrous oxide emissions from fruit orchards: A review. *Atmos. Environ.* 2019, 201, 166–172.
7. Pang J.Z.; Wang X.K.; Peng C.H.; Mu Y.J.; Ouyang Z.Y.; Lu F.; et al. Nitrous oxide emissions from soils under traditional cropland and apple orchard in the semi-arid Loess Plateau of China. *Agr. Ecosyst. Environ.* 2019, 269, 116–124.
8. Ju X.T.; Xing G.X.; Chen X.P.; Zhang S.L.; Zhang L.J.; Liu X.J.; et al. Reducing environmental risk by improving N management in intensive Chinese agricultural systems. *P. Natl. Acad. Sci. USA* 2009, 106, 3041–3046. <https://doi.org/10.1073/pnas.0813417106> PMID: 19223587
9. Cheng Y.; Xie W.; Huang R.; Yan X.Y.; Wang S.Q. Extremely high N<sub>2</sub>O but unexpectedly low NO emissions from a highly organic and chemical fertilized peach orchard system in China. *Agr. Ecosyst. Environ.* 2017, 246, 202–209.
10. Dong N.G.; Wang Y.; Zheng S.Q.; Wang S.D. Present situation and development suggestions of hawthorn industry in China. *China Fruits* 2022, 228, 87–91.
11. Li R.; Tao R.; Ling N.; Chu G.X. Chemical, organic and bio-fertilizer management practices effect on soil physicochemical property and antagonistic bacteria abundance of a cotton field: Implications for soil biological quality. *Soil Till. Res.* 2017, 167, 30–38.
12. Pirttilä A.M.; Tabas M.P.H.; Baruah N.; Koskimäki J.J. Biofertilizers and biocontrol agents for agriculture: How to identify and develop new potent microbial strains and traits. *Microorganisms* 2021, 9, 817. <https://doi.org/10.3390/microorganisms9040817> PMID: 33924411
13. Bhardwaj D.; Ansari M.W.; Sahoo R.K.; Tuteja N. Biofertilizers function as key player in sustainable agriculture by improving soil fertility, plant tolerance and crop productivity. *Microb. Cell Fact.* 2014, 13, 66. <https://doi.org/10.1186/1475-2859-13-66> PMID: 24885352
14. Cao T.N.D.; Mukhtar H.; Le L.T.; Tran D.P.H.; Ngo M.T.T.; Pham M.D.T.; et al. Roles of microalgae-based biofertilizer in sustainability of green agriculture and food-water-energy security nexus. *Sci. Total Environ.* 2023, 870, 161927. <https://doi.org/10.1016/j.scitotenv.2023.161927> PMID: 36736400
15. Dineshkumar R.; Kumaravel R.; Gopalsamy J.; Sikder M.N.A.; Sampathkumar P. Microalgae as bio-fertilizers for rice growth and seed yield productivity. *Waste Biomass Valori.* 2018, 9, 793–800.
16. Renuka N.; Prasanna R.; Sood A.; Ahluwalia A.S.; Bansal R.; Babu S.; et al. Exploring the efficacy of wastewater-grown microalgal biomass as a biofertilizer for wheat. *Environ. Sci. Pollut. R.* 2016, 23, 6608–6620. <https://doi.org/10.1007/s11356-015-5884-6> PMID: 26638970
17. Alobwede E.; Leake J.R.; Pandhal J. Circular economy fertilization: Testing micro and macro algal species as soil improvers and nutrient sources for crop production in greenhouse and field conditions. *Geoderma* 2019, 334, 113–123.
18. Dineshkumar R.; Subramanian J.; Gopalsamy J.; Jayasingam P.; Arumugam A.; Kannadasan S.; et al. The Impact of Using Microalgae as Biofertilizer in Maize (*Zea mays* L.). *Waste Biomass Valori.* 2019, 10, 1101–1110.
19. Cordeiro E.C.N.; Mógor Á.F.; Amatuzzi J.O.; Mógor G.; Marques H.M.C.; de Lara G.B. Microalga biofertilizer improves potato growth and yield, stimulating amino acid metabolism. *J. Appl. Phycol.* 2022, 34, 385–394.
20. Chamizo S.; Mugnai G.; Rossi F.; Certini G.; De Philippis R. Cyanobacteria Inoculation Improves Soil Stability and Fertility on Different Textured Soils: Gaining Insights for Applicability in Soil Restoration. *Front. Env. Sci.* 2018, 6, 49.
21. Yilmaz E.; Sönmez M. The role of organic/bio-fertilizer amendment on aggregate stability and organic carbon content in different aggregate scales. *Soil Till. Res.* 2017, 168, 118–124.
22. Costa O.Y.A.; Raaijmakers J.M.; Kuramae E.E. Microbial extracellular polymeric substances: ecological function and impact on soil aggregation. *Front. Microbiol.* 2018, 9, 1636. <https://doi.org/10.3389/fmicb.2018.01636> PMID: 30083145
23. Zhu C.B.; Chen S.L.; Yu J.; Schwaneberg U.; Chi Z.Y. Progress toward a bicarbonate-based microalgae production system. *Trends Biotechnol.* 2022, 40, 180–193. <https://doi.org/10.1016/j.tibtech.2021.06.005> PMID: 34325913
24. Fernández Valiente E.; Ucha A.; Quesada A.; Leganés F.; Carreres R. Contribution of N<sub>2</sub> fixing cyanobacteria to rice production: availability of nitrogen from 15N-labelled cyanobacteria and ammonium sulphate to rice. *Plant Soil* 2000, 221, 107–112.

25. Nisha R.; Kiran B.; Kaushik A.; Kaushik C.P. Bioremediation of salt affected soils using cyanobacteria in terms of physical structure, nutrient status and microbial activity. *Int. J. Environ. Sci. Te.* 2018, 15, 571–580.
26. Nayak M.; Swain D.K.; Sen R. Strategic valorization of de-oiled microalgal biomass waste as biofertilizer for sustainable and improved agriculture of rice (*Oryza sativa* L.) crop. *Sci. Total Environ.* 2019, 682, 475–484. <https://doi.org/10.1016/j.scitotenv.2019.05.123> PMID: 31128367
27. Renuka N.; Guldhe A.; Prasanna R.; Singh P.; Bux F. Microalgae as multi-functional options in modern agriculture: current trends, prospects and challenges. *Biotechnol. Adv.* 2018, 36, 1255–1273. <https://doi.org/10.1016/j.biotechadv.2018.04.004> PMID: 29673972
28. Hajnal-Jafari T.; Seman V.; Stamenov D.; Urić S. Effect of *Chlorella vulgaris* on growth and photosynthetic pigment content in Swiss chard (*Beta vulgaris* L. subsp. *cicla*). *Pol. J. Microbiol.* 2020, 69, 235–238. <https://doi.org/10.33073/pjm-2020-023> PMID: 32468805
29. Ali M.A.; Sattar M.A.; Islam M.N.; Inubushi K. Integrated effects of organic, inorganic and biological amendments on methane emission, soil quality and rice productivity in irrigated paddy ecosystem of Bangladesh: field study of two consecutive rice growing seasons. *Plant Soil* 2014, 378, 239–252.
30. Prasanna R.; Adak A.; Verma S.; Bidyarani N.; Babu S.; Pal M.; et al. Cyanobacterial inoculation in rice grown under flooded and SRI modes of cultivation elicits differential effects on plant growth and nutrient dynamics. *Ecol. Eng.* 2015, 84, 532–541.
31. Thanuja K.G.; Karthikeyan S. Exploring bio-mitigation strategies to reduce carbon footprint in wetland paddy system. *Bioresource Technology Reports* 2020, 12, 100557.
32. Shrestha R.C.; Ghazaryan L.; Poodiack B.; Zorin B.; Gross A.; Gillor O.; et al. The effects of microalgae-based fertilization of wheat on yield, soil microbiome and nitrogen oxides emissions. *Sci. Total Environ.* 2022, 806, 151320. <https://doi.org/10.1016/j.scitotenv.2021.151320> PMID: 34743875
33. Castro J.D.S.; Calijuri M.L.; Assemany P.P.; Cecon P.R.; de Assis I.R.; Ribeiro V.J. Microalgae biofilm in soil: Greenhouse gas emissions, ammonia volatilization and plant growth. *Sci. Total Environ.* 2017, 574, 1640–1648. <https://doi.org/10.1016/j.scitotenv.2016.08.205> PMID: 27614861
34. Suleiman A.K.A.; Lourenço K.S.; Clark C.; Luz R.L.; da Silva G.H.R.; Vet L.E.M.; et al. From toilet to agriculture: Fertilization with microalgal biomass from wastewater impacts the soil and rhizosphere active microbiomes, greenhouse gas emissions and plant growth. *Resour. Conserv. Recy.* 2020, 161, 104924.
35. Pelster D.E.; Chantigny M.H.; Rochette P.; Angers D.A.; Rieux C.; Vanasse A. Nitrous oxide emissions respond differently to mineral and organic nitrogen sources in contrasting soil types. *J. Environ. Qual.* 2012, 41, 427–435. <https://doi.org/10.2134/jeq2011.0261> PMID: 22370405
36. Paré M.C.; Bedard-Haughn A. Soil organic matter quality influences mineralization and GHG emissions in cryosols: a field-based study of sub- to high Arctic. *Global Change Biol.* 2013, 19, 1126–1140. <https://doi.org/10.1111/gcb.12125> PMID: 23504890
37. Huang M.T.; Zhai P.M. Achieving Paris Agreement temperature goals requires carbon neutrality by middle century with far-reaching transitions in the whole society. *Adv. Clim. Chang. Res.* 2021, 12, 281–286.
38. Wang K.J.; Hu B.J.; Zheng C.G.; Deng Z.Y.; Duan J.; Qin K.X.; et al. Application of *Anabaena azotica*- and *Chlorella pyrenoidosa*-based algal biotechnology in green production of algae-rich *Crataegi fructus*. *J. Healthc. Eng.* 2022, 8424890, 1–7. <https://doi.org/10.1155/2022/8424890> PMID: 35399853
39. Church M.J.; Short C.M.; Jenkins B.D.; Karl D.M.; Zehr J.P. Temporal Patterns of Nitrogenase Gene (*nifH*) Expression in the Oligotrophic North Pacific Ocean. *Appl. Environ. Microb.* 2005, 71, 5362–5370. <https://doi.org/10.1128/AEM.71.9.5362-5370.2005> PMID: 16151126
40. Zhang J.L.; Song X.N.; Wei H.; Zhou W.C.; Peng C.R.; Li D.H. Effect of substituting nitrogen fertilizer with nitrogen-fixing cyanobacteria on yield in a double-rice cropping system in southern China. *J. Appl. Phycol.* 2021, 33, 2221–2232.
41. Amorim M.L.; Soares J.; Coimbra J.S.D.R.; Leite M.D.O.; Albino L.F.T.; Martins M.A. Microalgae proteins: production, separation, isolation, quantification, and application in food and feed. *Crit. Rev. Food Sci.* 2021, 61, 1976–2002. <https://doi.org/10.1080/10408398.2020.1768046> PMID: 32462889
42. Zhou L.X.; Liu W.; Duan H.J.; Dong H.W.; Li J.C.; Zhang S.X.; et al. Improved effects of combined application of nitrogen-fixing bacteria *Azotobacter beijerinckii* and microalgae *Chlorella pyrenoidosa* on wheat growth and saline-alkali soil quality. *Chemosphere.* 2023, 313, 137409. <https://doi.org/10.1016/j.chemosphere.2022.137409> PMID: 36457265
43. Zheng X.H.; Mei B.L.; Wang Y.H.; Xie B.H.; Wang Y.S.; Dong H.B.; et al. Quantification of N<sub>2</sub>O fluxes from soil–plant systems may be biased by the applied gas chromatograph methodology. *Plant Soil* 2008, 311, 211–234.
44. Huang T.; Yang H.; Huang C.C.; Ju X.T. Effect of fertilizer N rates and straw management on yield-scaled nitrous oxide emissions in a maize-wheat double cropping system. *Field Crop Res.* 2017, 204, 1–11.

45. Mosier A.R.; Halvorson A.D.; Reule C.A.; Liu X.J. Net global warming potential and greenhouse gas intensity in irrigated cropping systems in Northeastern Colorado. *J. Environ. Qual.* 2006, 35, 1584–1598. <https://doi.org/10.2134/jeq2005.0232> PMID: 16825479
46. Vance E.; Brookes P.C.; Jenkinson D.S. An extraction method for measuring soil microbial biomass C. *Soil Biol. Biochem.* 1987, 19, 703–707.
47. Suchithra M.R.; Muniswami D.M.; Sri M.S.; Usha R.; Rasheeq A.A.; Preethi B.A.; et al. Effectiveness of green microalgae as biostimulants and biofertilizer through foliar spray and soil drench method for tomato cultivation. *S. Afr. J. Bot.* 2022, 146, 740–750.
48. Gougoulas N.; Papapolymerou G.; Karayannis V.; Spiliotis X.; Chouliaras N. Effects of manure enriched with algae *Chlorella vulgaris* on soil chemical properties. *Soil Water Res.* 2018, 13, 51–59.
49. Murphy D.V.; Recous S.; Stockdale E.A.; Fillery I.R.P.; Jensen L.S.; Hatch D.J.; et al. Gross nitrogen fluxes in soil: theory, measurement and application of  $^{15}\text{N}$  pool dilution techniques. *Adv. Agron.* 2000, 79, 69–118.
50. Zaman M.; Di H.J.; Cameron K.C.; Frampton C.M. Gross nitrogen mineralization and nitrification rates and their relationships to enzyme activities and the soil microbial biomass in soils treated with dairy shed effluent and ammonium fertilizer at different water potentials. *Biol. Fert. Soils* 1999, 29, 178–186.
51. Tarakhovskaya E.R.; Maslov Y.I.; Shishova M.F. Phytohormones in algae. *Russ. J. Plant Phys.* 2007, 54, 163–170.
52. Coppens J.; Grunert O.; Hende S.V.D.; Vanhoutte I.; Boon N.; Haesaert G.; et al. The use of microalgae as a high-value organic slow-release fertilizer results in tomatoes with increased carotenoid and sugar levels. *J. Appl. Phycol.* 2016, 28, 2367–2377.
53. Li Y.; Xu S.S.; Gao J.; Pan S.; Wang G.X. *Chlorella* induces stomatal closure via NADPH oxidase-dependent ROS production and its effects on instantaneous water use efficiency in *Vicia faba*. *PLOS ONE*. 2014, 9, e93290. <https://doi.org/10.1371/journal.pone.0093290> PMID: 24687099
54. Grzesik M.; Romanowska-Duda Z.; Kalaji H.M. Effectiveness of cyanobacteria and green algae in enhancing the photosynthetic performance and growth of willow (*Salix viminalis* L.) plants under limited synthetic fertilizers application. *Photosynthetica*. 2017, 55, 510–521.
55. Itakura M.; Uchida Y.; Akiyama H.; Hoshino Y.T.; Shimomura Y.; Morimoto S.; et al. Mitigation of nitrous oxide emissions from soils by *Bradyrhizobium japonicum* inoculation. *Nat. Clim. Change* 2013, 3, 208–212.
56. Nishizawa T.; Quan A.H.; Kai A.; Tago K.; Ishii S.; Shen W.S.; et al. Inoculation with  $\text{N}_2$ -generating denitrifier strains mitigates  $\text{N}_2\text{O}$  emission from agricultural soil fertilized with poultry manure. *Biol. Fert. Soils* 2014, 50, 1001–1007.
57. Lourenço K.S.; Suleiman A.K.A.; Pijl A.; van Veen J.A.; Cantarella H.; Kuramae E.E. Resilience of the resident soil microbiome to organic and inorganic amendment disturbances and to temporary bacterial invasion. *Microbiome* 2018, 6, 142. <https://doi.org/10.1186/s40168-018-0525-1> PMID: 30103819
58. Signor D.; Cerri P.C.E. Nitrous oxide emissions in agricultural soils: a review. *Pesqui. Agropecu. Trop.* 2013, 43, 322–338.
59. Zhu G.D.; Song X.T.; Ju X.T.; Zhang J.B.; Müller C.; Sylvester-Bradley R.; et al. Gross N transformation rates and related  $\text{N}_2\text{O}$  emissions in Chinese and UK agricultural soils. *Sci. Total Environ.* 2019, 666, 176–186.
60. Plouviez M.; Shilton A.; Packer M.A.; Guieysse B. Nitrous oxide emissions from microalgae: potential pathways and significance. *J. Appl. Phycol.* 2019, 31, 1–8.
61. Guieysse B.; Plouviez M.; Coilhac M.; Cazali L. Nitrous Oxide ( $\text{N}_2\text{O}$ ) production in axenic *Chlorella vulgaris* microalgae cultures: evidence, putative pathways, and potential environmental impacts. *Biogeosciences* 2013, 10, 6737–6746.
62. Liu J.L.; Chen X.P.; Zhan A.; Luo S.S.; Chen H.; Jiang H.B.; Huang X.Y.; Li S.Q. Methane uptake in semiarid farmland subjected to different mulching and nitrogen fertilization regimes. *Biol. Fert. Soils* 2016, 52, 941–950.
63. Chen J.H.; Zhang Y.J.; Yang Y.; Tao T.T.; Sun X.; Guo P. Effects of increasing organic nitrogen inputs on  $\text{CO}_2$ ,  $\text{CH}_4$ , and  $\text{N}_2\text{O}$  fluxes in a temperate grassland. *Environ. Pollut.* 2021, 268, 115822.
64. Del Grosso S.J.; Parton W.J.; Mosier A.R.; Ojima D.S.; Potter C.S.; Borken W.; et al. General  $\text{CH}_4$  oxidation model and comparisons of  $\text{CH}_4$  oxidation in natural and managed systems. *Global Biogeochem. Cy.* 2000, 14, 999–1019.
65. Katiyar R.; Gurjar B.R.; Biswas S.; Pruthi V.; Kumar N.; Kumar P. Microalgae: An emerging source of energy based bio-products and a solution for environmental issues. *Renew. Sust. Energy. Rev.* 2017, 72, 1083–1093.
66. Prasanna R.; Kumar V.; Kumar S.; Yadav A.K.; Tripathi U.; Singh A.K.; et al. Methane production in rice soil is inhibited by cyanobacteria. *Microbiol. Res.* 2002, 157, 1–6. <https://doi.org/10.1078/0944-5013-00124> PMID: 11911608



67. Gao B.; Ju X.T.; Su F.; Meng Q.F.; Oenema O.; Christie P.; et al. Nitrous oxide and methane emissions from optimized and alternative cereal cropping systems on the North China Plain: A two-year field study. *Sci. Total Environ.* 2014, 472, 112–124. <https://doi.org/10.1016/j.scitotenv.2013.11.003> PMID: 24291136
68. Bodelier P.L.E.; Laanbroek H.J. Nitrogen as a regulatory factor of methane oxidation in soils and sediments. *FEMS Microbiol. Ecol.* 2004, 47, 265–277. [https://doi.org/10.1016/S0168-6496\(03\)00304-0](https://doi.org/10.1016/S0168-6496(03)00304-0) PMID: 19712315
69. Marks E.A.N.; Miñón J.; Pascual A.; Montero O.; Navas L.M.; Rad C. Application of a microalgal slurry to soil stimulates heterotrophic activity and promotes bacterial growth. *Sci. Total Environ.* 2017, 605–606, 610–617. <https://doi.org/10.1016/j.scitotenv.2017.06.169> PMID: 28672249
70. Wang R.F.; Peng B.; Huang K.Y. The research progress of CO<sub>2</sub> sequestration by algal bio-fertilizer in China. *J. CO<sub>2</sub> Util.* 2015, 11, 67–70.
71. Hu C.X.; Liu Y.D.; Paulsen B.S.; Petersen D.; Klaveness D. Extracellular carbohydrate polymers from five desert soil algae with different cohesion in the stabilization of fine sand grain. *Carbohydr. Polym.* 2003, 54, 33–42.
72. Delattre C.; Pierre G.; Laroche C.; Michaud P. Production, extraction and characterization of microalgal and cyanobacterial exopolysaccharides. *Biotechnol. Adv.* 2016, 34, 1159–1179. <https://doi.org/10.1016/j.biotechadv.2016.08.001> PMID: 27530696
73. Tu R.J.; Jin W.B.; Han S.F.; Zhou X.; Wang J.Q.; Wang Q.; et al. Enhancement of microalgal lipid production in municipal wastewater: Fixation of CO<sub>2</sub> from the power plant tail gas. *Biomass Bioenerg.* 2019, 131, 105400.
74. Trumbore S. Age of soil organic matter and soil respiration: Radiocarbon constraints on belowground C dynamics. *Ecol. Appl.* 2000, 10, 399–411.
